# Supplementary material
Source: PubMed Central journal article supplement (PMC6659743)
Supplement: NIHMS1035684-supplement-Appendix_2.pdf [file NIHMS1035684-supplement-Appendix_2.pdf]

**APPENDIX 2 – MULTINOMIAL REGRESSION:  
A COMPARISON BETWEEN POSTPONERS AND CHILDLESS WOMEN WHO EXPECT CHILDLESSNESS**

Table 2.1. *Multinomial regression models:  
Relative risk ratios of motherhood and expecting childlessness at ages 24,30,34 and 40.*

| Variables                                            | Category 1: Mothers |         |         |         | Category 2: Postponers |        |        |        | Category 3: Expecting childlessness <sup>1</sup> |        |        |        |
|------------------------------------------------------|---------------------|---------|---------|---------|------------------------|--------|--------|--------|--------------------------------------------------|--------|--------|--------|
|                                                      | Age 24              | Age 30  | Age 34  | Age 40  | Age 24                 | Age 30 | Age 34 | Age 40 | Age 24                                           | Age 30 | Age 34 | Age 40 |
| Race/Ethnicity (Ref: White)                          |                     |         |         |         |                        |        |        |        |                                                  |        |        |        |
| Black                                                | 5.1***              | 2.8***  | 2.5***  | 1.3     |                        |        |        |        | 0.9                                              | 0.6    | 0.8    | 0.5*   |
| Hispanic                                             | 1.7***              | 1.4     | 1.3     | 0.9     |                        |        |        |        | 0.7                                              | 0.5*   | 0.7    | 0.5    |
| Other                                                | 1.2                 | 1.0     | 1.1     | 0.7     |                        |        |        |        | 1.2                                              | 1.0    | 1.3    | 0.7    |
| # of siblings (Ref: 1 sibling)                       |                     |         |         |         |                        |        |        |        |                                                  |        |        |        |
| 0                                                    | 0.6                 | 0.5*    | 0.7     | 1.0     |                        |        |        |        | 1.6                                              | 1.1    | 2.2    | 2.2    |
| 2                                                    | 0.9                 | 0.9     | 1.1     | 1.2     |                        |        |        |        | 1.4                                              | 0.8    | 1.6    | 1.4    |
| 3+                                                   | 1.2                 | 0.9     | 1.1     | 1.7     |                        |        |        |        | 1.1                                              | 0.7    | 1.1    | 0.8    |
| Mother worked when R was 14 (Ref: No)                |                     |         |         |         |                        |        |        |        |                                                  |        |        |        |
| Yes                                                  | 1.3*                | 1.1     | 0.8     | 1.0     |                        |        |        |        | 0.9                                              | 1.1    | 0.8    | 0.9    |
| Mother's education (Ref: High school)                |                     |         |         |         |                        |        |        |        |                                                  |        |        |        |
| Did not finish high school                           | 1.5***              | 1.1**   | 1.3     | 1.0     |                        |        |        |        | 1.1                                              | 1.4    | 0.8    | 0.8    |
| Finished college                                     | 0.8                 | 0.6     | 0.8     | 0.5     |                        |        |        |        | 1.0                                              | 0.9    | 0.9    | 0.7    |
| Church attendance 1979 (Ref: Less than once a week)  |                     |         |         |         |                        |        |        |        |                                                  |        |        |        |
| At least once a week                                 | 0.9                 | 0.9     | 1.1     | 0.9     |                        |        |        |        | 0.9                                              | 0.9    | 1.1    | 0.8    |
| Highest degree completed (Ref: Finished high school) |                     |         |         |         |                        |        |        |        |                                                  |        |        |        |
| Did not finish high school                           | 3.5***              | 2.4***  | 1.7     | 1.9     |                        |        |        |        | 2.0*                                             | 1.8    | 1.3    | 1.2    |
| Finished college                                     | 0.1***              | 0.3***  | 0.3***  | 0.3***  |                        |        |        |        | 0.7                                              | 0.6**  | 0.5*** | 0.7    |
| Marital status (Ref: Never married)                  |                     |         |         |         |                        |        |        |        |                                                  |        |        |        |
| Married                                              | 10.0***             | 13.2*** | 15.5*** | 15.4*** |                        |        |        |        | 0.8                                              | 0.6*   | 0.8    | 1.0    |
| Separated/divorced/widowed                           | 9.1***              | 8.5***  | 7.8***  | 12.3*** |                        |        |        |        | 1.7                                              | 0.7    | 1.1    | 1.6    |
| Employment (Ref: Employed)                           |                     |         |         |         |                        |        |        |        |                                                  |        |        |        |
| Unemployed                                           | 1.7*                | 2.1     | 0.9     | 2.6     |                        |        |        |        | 0.8                                              | 1.5    | 0.6    | 0.9    |
| Out of labor force                                   | 5.6***              | 6.2***  | 4.4***  | 4.3**   |                        |        |        |        | 1.0                                              | 0.9    | 1.4    | 1.8    |
| Ever had non-biological children by age X            |                     |         |         |         |                        |        |        |        |                                                  |        |        |        |
| Constant                                             | 0.1                 | 0.5     | 1.0     | 2.9     |                        |        |        |        | 0.1                                              | 0.5    | 0.9    | 4.1    |
| F-statistic                                          | 21.8                | 16.2    | 12.8    | 9.1     |                        |        |        |        |                                                  |        |        |        |
| p-value                                              | 0.00                | 0.00    | 0.00    | 0.00    |                        |        |        |        |                                                  |        |        |        |
| Observations                                         | 2,192               | 3,027   | 3,590   | 3,816   | 2,058                  | 948    | 470    | 144    | 178                                              | 253    | 368    | 468    |

<sup>1</sup> Multinomial regression – relative risk ratios for the comparison of women, who are childless and expect having no children in the future (expecting childlessness) with women, who are childless and expect children in the future (postponers). Models estimated separately for ages 24, 30, 34, 40. Models control for region (South/Non-South) and type (rural/urban) of residence. Models estimated using 4,428 observations. 45 women in the military dropped due to small cell size. \*\*\* p-value <0.001, \*\* p-value <0.01, \* p-value <0.05.
