# Supplementary material
Source: PubMed Central journal article supplement (PMC6659743)
Supplement: NIHMS1035684-supplement-Appendix_3.pdf [file NIHMS1035684-supplement-Appendix_3.pdf]

APPENDIX 3 – LOGISTIC REGRESSION FOR EXPECTING CHILDLESSNESS:

EFFECTS OVER TIME

Table 3.1 *Expecting childlessness: bivariate logistic regression for with time interactions.*

| Variables                                            | Model 1  | Model 2 <sup>a</sup> |
|------------------------------------------------------|----------|----------------------|
|                                                      | OR       | OR                   |
| Race/Ethnicity (Ref: White)                          |          |                      |
| Black                                                | 0.88     | 0.76                 |
| Hispanic                                             | 0.83     | 0.93                 |
| Other                                                | 1.33     | 1.40                 |
| # of siblings (Ref: 1 sibling)                       |          |                      |
| 0                                                    | 1.17     | 1.07                 |
| 2                                                    | 1.14     | 1.23                 |
| 3+                                                   | 1.13     | 1.22                 |
| Mother worked when R was 14 (Ref: No)                |          |                      |
| Yes                                                  | 0.88     | 0.85                 |
| Mother's education (Ref: High school)                |          |                      |
| Did not finish high school                           | 0.89     | 1.06                 |
| Finished college                                     | 0.83     | 0.86                 |
| Church attendance 1979 (Ref: Less than once a week)  |          |                      |
| At least once a week                                 | 0.98     | 0.99                 |
| Highest degree completed (Ref: Finished high school) |          |                      |
| Did not finish high school                           | 1.44     | 1.71                 |
| Finished college                                     | 0.49***  | 0.65                 |
| Marital status (Ref: Never married)                  |          |                      |
| Married                                              | 0.71*    | 0.61*                |
| Separated/divorced/widowed                           | 1.15     | 1.67                 |
| Employment (Ref: Employed)                           |          |                      |
| Unemployed                                           | 1.02     | 0.72                 |
| Out of labor force                                   | 0.88     | 0.86                 |
| Ever had non-biological children                     | 1.87*    | 2.08                 |
| Age (ref: Age 24)                                    |          |                      |
| 30                                                   | 3.26***  | 5.10**               |
| 34                                                   | 9.87***  | 13.22***             |
| 40                                                   | 47.13*** | 45.04***             |
| Testing interactions:                                |          | OR                   |
| Black*Age30                                          |          |                      |
| Black*Age34                                          |          | 1.35                 |
| Black*Age40                                          |          | 1.14                 |
| Hispanic*Age30                                       |          | 0.84                 |
| Hispanic*Age34                                       |          | 1.07                 |
| Hispanic*Age40                                       |          | 0.80                 |
| Race: Other*Age30                                    |          | 0.94                 |
| Race: Other*Age34                                    |          | 0.58                 |
| Race: Other*Age40                                    |          | 0.93                 |
| Siblings=0*Age30                                     |          | 0.94                 |
| Siblings=0*Age34                                     |          | 1.82                 |
| Siblings=0*Age40                                     |          | 0.89                 |
| Siblings=2*Age30                                     |          | 0.49                 |
| Siblings=2*Age34                                     |          | 1.38                 |
| Siblings=2*Age40                                     |          | 1.38                 |
| Siblings=3+*Age30                                    |          | 0.62                 |
| Siblings=3+*Age34                                    |          | 1.29                 |
| Siblings=3+*Age40                                    |          | 0.96                 |
| Mother worked when R was 14*Age30                    |          | 1.38                 |
| Mother worked when R was 14*Age34                    |          | 0.88                 |
| Mother worked when R was 14*Age40                    |          | 0.89                 |
| Mother did not finish high school*Age 30             |          | 0.93                 |
| Mother did not finish high school*Age34              |          | 0.59                 |
| Mother did not finish high school*Age40              |          | 0.71                 |
| Mother finished college*Age30                        |          | 0.94                 |

|                                                  |             |       |
|--------------------------------------------------|-------------|-------|
| Mother finished college*Age34                    | 0.88        |       |
| Mother finished college*Age40                    | 1.08        |       |
| Church attendance: At least once a week*Age30    | 0.89        |       |
| Church attendance: At least once a week*Age34    | 1.22        |       |
| Church attendance: At least once a week*Age40    | 0.93        |       |
| Education: Did not finish high school*Age30      | 1.01        |       |
| Education: Did not finish high school*Age34      | 0.81        |       |
| Education: Did not finish high school*Age40      | 0.50        |       |
| Education: Finished college*Age30                | 0.90        |       |
| Education: Finished college*Age34                | 0.39*       |       |
| Education: Finished college*Age40                | 0.76        |       |
| Marital Status: Married*Age30                    | 0.93        |       |
| Marital Status: Married*Age34                    | 1.04        |       |
| Marital Status: Married*Age40                    | 2.28*       |       |
| Marital Status: Separated/divorced/widowed*Age30 | 0.54        |       |
| Marital Status: Separated/divorced/widowed*Age34 | 0.55        |       |
| Marital Status: Separated/divorced/widowed*Age40 | 0.98        |       |
| Employment Status: Unemployed*Age30              | 3.82        |       |
| Employment Status: Unemployed*Age34              | 1.02        |       |
| Employment Status: Unemployed*Age40              | 1.35        |       |
| Employment Status: Out of labor force*Age30      | 0.99        |       |
| Employment Status: Out of labor force*Age34      | 0.76        |       |
| Employment Status: Out of labor force*Age40      | 1.43        |       |
| Ever had non-biological children*Age30           | 0.83        |       |
| Ever had non-biological children*Age34           | 1.14        |       |
| Ever had non-biological children*Age40           | 0.72        |       |
| Joint test for the significance of interaction:  | p-value     |       |
| Black*Age                                        | 0.87        |       |
| Hispanic*Age                                     | 0.94        |       |
| Race: Other*Age                                  | 0.66        |       |
| Siblings=0*Age                                   | 0.80        |       |
| Siblings=2*Age                                   | 0.12        |       |
| Siblings=3*Age                                   | 0.41        |       |
| Mother worked when R was 14*Age                  | 0.42        |       |
| Mother did not finish high school*Age            | 0.45        |       |
| Mother finished college*Age                      | 0.98        |       |
| Church attendance: At least once a week*Age      | 0.72        |       |
| Education: Did not finish high school*Age        | 0.38        |       |
| Education: Finished college*Age                  | <b>0.04</b> |       |
| Marital Status: Married*Age                      | 0.08        |       |
| Marital Status: Separated/divorced/widowed*Age   | 0.36        |       |
| Employment Status: Unemployed*Age                | 0.45        |       |
| Employment Status: Out of labor force*Age        | 0.78        |       |
| Ever had non-biological children*Age             | 0.88        |       |
| Constant                                         | 0.05        | 0.04  |
| Sigma                                            | 1.75        | 1.79  |
| Rho                                              | 0.48        | 0.49  |
| Observations                                     | 1,969       | 1,969 |

<sup>a</sup>Model testing interactions over time.

Models control for region (South/Non-South) and type (rural/urban) of residence.

Models estimated using 4,428 observations. Women in the military dropped due to small cell size.

\*\*\* p-value <0.001, \*\* p-value <0.01, \* p-value <0.05.
